**Gradual replacement of wild bees by honeybees  
in flowers of the Mediterranean Basin over the last 50 years**

Carlos M. Herrera

Estación Biológica de Doñana, Consejo Superior de Investigaciones Científicas,

Avda. Americo Vespucio 26, E-41092 Sevilla, Spain

e-mail: [herrera@ebd.csic.es](mailto:herrera@ebd.csic.es)

# **Abstract**

Evidence for pollinator decline largely originates from mid-latitude regions in North America and Europe. Geographical heterogeneity in pollinator trends combined with geographical biases in pollinator studies, can produce distorted extrapolations and limit understanding of pollinator responses to environmental changes. In contrast to the declines experienced in some well-investigated European and North American regions, honeybees seem to have increased recently in some areas of the Mediterranean Basin. Since honeybees can impact negatively on wild bees, it was hypothesized that a biome-wide alteration in bee pollinator assemblages may be underway in the Mediterranean Basin involving a reduction in the importance of wild bees as pollinators. This hypothesis was tested using data on composition of bee pollinators of wild and cultivated plants obtained from studies conducted between 1963-2017 in 13 circum-Mediterranean countries. Honeybee colonies increased exponentially and wild bees were gradually replaced by honeybees in flowers of wild and cultivated plants. Proportion of wild bees at flowers quadruplicated that of honeybees at the beginning of the period, the proportions of both groups becoming roughly similar fifty years later. The Mediterranean Basin is a world biodiversity hotspot for wild bees and wild bee-pollinated plants, and the ubiquitous rise of honeybees to dominance as pollinators could in the long run undermine the diversity of plants and wild bees, as well as their mutualistic relationships in the region.

**Key words:** bee pollination, honeybees, long-term trends, Mediterranean Basin, wild bees.

22 *“El sur también existe”*  
 23 Joan Manuel Serrat, singer and songwriter  
 24

## 25 **Introduction**

26 The structure and dynamics of ecological communities can vary tremendously across  
 27 biomes and continents. Critical elements of ecological knowledge will thus be closely tied  
 28 to the particular location where it is attained, and attempts at extrapolations which are  
 29 based on limited, spatially biased ecological data may produce distorted or erroneous  
 30 inferences (Martin et al. 2012, Culumber et al. 2019). For instance, unawareness of  
 31 geographical sampling biases has been pointed out as one possible source of unsupported  
 32 generalizations related to the notions of “pollinator decline” and “pollination crisis”  
 33 (Ghazoul 2005, Archer 2014, Herrera 2019, Jamieson et al. 2019), two topics that have  
 34 recently elicited considerable academic and popular interest because of the importance of  
 35 animal pollination for the reproduction of many wild and crop plants (Ollerton et al. 2014,  
 36 Senapathi et al. 2015, Breeze et al. 2016, Ollerton 2017). Evidence for the widely held  
 37 view of a generalized pollinator decline is strongly biased geographically, as it mostly  
 38 originates from a few mid-latitude regions in Europe and North America (Rodger et al.  
 39 2004, Ghazoul 2005, Winfree et al. 2009, Archer 2014, Hung et al. 2018, Nicholson and  
 40 Egan 2019). Mounting evidence indicates, however, that pollinator declines are not  
 41 universal; that the sign and magnitude of temporal trends in pollinator abundance may  
 42 differ among pollinator groups, continents or regions; and that taxonomic and  
 43 geographical biases in pollinator studies in combination with unrecognized patterns of  
 44 geographical or taxonomic differences in pollinator trends are bound to limit a realistic  
 45 understanding of pollinator responses to environmental changes and the causal

46 mechanisms involved (Aizen and Harder 2009a,b, Potts et al. 2010, vanEngelsdorp and  
47 Meixner 2010, Hofmann et al. 2018, Herrera 2019, Jamieson et al. 2019).

48 Even for well-studied social bees, data supporting a general decline of these important  
49 pollinators tend to be geographically biased (Archer et al. 2014, Ollerton 2017, Hung et al.  
50 2018). For example, in thoroughly studied North America and mid-western Europe the  
51 number of honeybee colonies has experienced severe declines, but the trend is apparently  
52 reversed in the less investigated areas of southern Europe, where honeybee colonies seem  
53 to have been steadily increasing over large territories in the last decades (Aizen and  
54 Harder 2009a: Fig. S1, Potts et al. 2010, vanEngelsdorp and Meixner 2010, Moritz and  
55 Erler 2016). Honeybees have been repeatedly shown to have negative impacts on wild bee  
56 populations in both natural and anthropogenic scenarios (Goulson and Sparrow 2009,  
57 Shavit et al. 2009, Lindström et al. 2016, Torné-Noguera et al. 2016, Magrach et al. 2017,  
58 Ropars et al. 2019, Valido et al. 2019). I thus formulated the hypothesis that, if the  
59 abundance of managed honeybees has been actually increasing in the Mediterranean Basin  
60 over the last decades, then a profound biome-wide alteration in the composition of bee  
61 pollinator assemblages could be currently underway there, involving a gradual  
62 replacement of wild bees by honeybees in flowers. This paper verifies this hypothesis  
63 using data from a large sample of published investigations on the composition of bee  
64 pollinators of wild and cultivated plants, conducted during the last 50 years throughout the  
65 Mediterranean Basin. Results of this study stress the importance of broadening the  
66 geographical scope of current investigations on pollinator trends, while at the same time  
67 issue a warning on the perils of uncritically importing to Mediterranean ecosystems  
68 honeybee conservation actions specifically designed for the contrasting situations that  
69 prevail in temperate-climate European or North American countries.

## 70 **Material and methods**

### 71 *The data*

72 The literature on floral biology, pollination ecology, plant-pollinator interactions and crop  
 73 pollination was searched for field studies conducted during 1960-2019 in the  
 74 Mediterranean Basin and providing quantitative data on the relative abundance of  
 75 honeybees and wild bees at flowers of insect-pollinated plants, either wild-growing or  
 76 cultivated. Preliminary searches had shown that studies conducted before 1960 quite  
 77 rarely reported quantitative data on bee abundance at flowers. The literature screening  
 78 used searches in Web of Science, Google Scholar and my personal database of plant-  
 79 pollinator studies. To improve the chances of obtaining a representative, geographically  
 80 comprehensive coverage of all regions surrounding the Mediterranean Sea (i.e., African,  
 81 Asian and European shores), literature searches were conducted using terms in English,  
 82 French, Italian, Portuguese and Spanish. For inclusion in this study I considered  
 83 exclusively field investigations where (1) quantitative data were provided on relative  
 84 numbers of wild bees and honeybees based on direct visual counts or standardized  
 85 collections at flowering individuals or flowering patches of single plant species.  
 86 Investigations at the plant community level or providing semiquantitative or subjective  
 87 abundance scores of bee abundance were thus excluded; and (2) the year(s) on which bee  
 88 abundance data had been originally collected in the field was unambiguously stated. In a  
 89 few publications where information from two or more study years had been pooled into a  
 90 single estimate of wild bee and honeybee abundances, but the data were otherwise  
 91 suitable, the average year was used. A total of 336 estimates of wild bee and honeybee  
 92 abundance at the flowers of 200 plant species were gathered from 136 different literature  
 93 sources. Each data record corresponded to a unique combination of plant species x  
 94 sampling year x sampling location. The data had been collected in the field between 1963–

2017 in 13 different countries surrounding the Mediterranean Sea (Fig. 1). Information on plant type (wild-growing vs. cultivated) and taxonomic affiliation (plant family) was also incorporated into the data set.

The complete data set including literature sources is presented in Table S1, electronic supplementary material. Most data originated from Spain, Italy, Algeria and Egypt (159, 59, 33 and 21 records, respectively; Fig. 1). The median of the distribution of study years was 1996 (interquartile range = 1986-2008). There were 106 and 230 records for cultivated and wild-growing plants, respectively. A total of 54 plant families were represented in the sample, with most species belonging to Fabaceae, Lamiaceae, Asteraceae, Rosaceae and Cistaceae; 51, 34, 32, 30 and 25 records, respectively).

Trends in honeybee abundance in the Mediterranean Basin over the period considered in this study were assessed using information gathered from the Food and Agriculture Organization (FAO) of the United Nations global database (FAOSTAT; <http://www.fao.org/faostat>). This data source has been used previously in historical reviews of honeybee abundance (Aizen and Harder 2009a,b, vanEngelsdorp and Meixner 2010, Moritz and Erler 2016). Number of honeybee colonies per country and year for the period 1963-2017 was obtained from FAOSTAT (accessed 25 September 2019) for each of the 13 Mediterranean countries with estimates of wild bee and honeybee relative abundances in my data set (Fig. 1). Comparable abundance figures were obtained by dividing the number of honeybee colonies by the land surface of the country (obtained also from FAOSTAT), which provided estimates of honeybee colonies/km<sup>2</sup> per country and year. Data on honey production per country and year were also obtained from FAOSTAT to check the reliability of colony number data as a suitable proxy for honeybee abundance (Aizen and Harder 2009b, Moritz and Erler 2016).

# 119 *Statistical analyses*

120 Original figures of bee abundance at flowers from the literature were transformed to  
121 proportions of wild bees ( $p_{wb}$ ) and honeybees ( $p_{hb} = 1 - p_{wb}$ ) relative to all bees combined.  
122 For the purpose of statistical analyses, the log-odds that one randomly chosen bee found at  
123 flowers was a wild bee rather than a honeybee was estimated for each data record using  
124 the logit transformation,  $\text{logit}(p_{wb}) = \log(p_{wb}/p_{hb})$ . Since the logit function is undefined for  
125  $p = 0$  or  $1$ , proportions were remapped to the interval  $(0.05, 0.95)$  prior to the  
126 transformation.

127 The null hypothesis that the relative proportions of wild and honeybees at flowers  
128 were unrelated to year of data collection was tested by fitting a linear mixed effect model.  
129  $\text{Logit}(p_{wb})$  was the response variable, and data collection year (treated as a continuous  
130 numerical variable), plant type (two-level factor, wild-growing vs. cultivated) and their  
131 interaction were included as fixed effects. Country of origin, plant family and plant  
132 species were included as random effects to statistically control for, on one side, the effects  
133 of likely taxonomic and geographical correlations in the data and, on the other, the  
134 unbalanced distribution of data across countries and plant taxonomic groups. The  
135 existence of a long-term trend in honeybee abundance in the Mediterranean Basin as a  
136 whole was tested by fitting a linear mixed model to the FAOSTAT colony density data  
137 (log-transformed). Year (as a numerical variable) was the single fixed effect, and country  
138 was included in the model as a random effect to account for the correlated data of the  
139 same country. Linear mixed models allow drawing conclusions on fixed effects with  
140 reference to a broad inference space whose scope transcends the specific samples studied  
141 (McLean et al. 1991, Bolker 2015). In the present instance, the universe of all countries  
142 and plant species in the Mediterranean Basin that could have been sampled for this study  
143 represents the broad inference space (Schabenberger and Pierce 2001). Conclusions on

144 long-term trends in honeybee abundance and  $\text{logit}(p_{wb})$ , including predicted marginal  
145 effects, will thus refer to such inference space.

146 All statistical analyses were carried out using the R environment (R Core Team  
147 2018). Linear mixed models were fitted with the lmer function in the lme4 package (Bates  
148 et al. 2015). Statistical significance of fixed effects was assessed using analysis of  
149 deviance-based, Type II Wald chi-square tests using the Anova function in the car package  
150 (Fox and Weisberg 2011). The function ggpredict from theggeffects package (Lüdtke  
151 2018) was used to compute marginal effects of year on  $\text{logit}(p_{wb})$  separately for wild-  
152 growing and cultivated plants.

## 153 **Results**

154 Estimated density of managed honeybee colonies tended to increase steadily over the  
155 1963-2017 period in most Mediterranean countries considered in this paper (Fig. 2). The  
156 linear mixed model fitted to colony density data (log-transformed), with year as fixed  
157 effect and country as random effect, revealed a highly significant linear effect of year on  
158 colony density (Chi-squared = 412.9,  $P < 10^{-16}$ ). The estimated linear trend for the whole  
159 Mediterranean Basin obtained from this model is depicted by the blue line in Fig. 2.  
160 Linearity of the estimated relationship on the logarithmic scale reveals an exponential  
161 increase in the density of honeybee colonies in the region over the period considered.  
162 There was a close linear relationship across years between mean per-country honey  
163 production and number of honeybee colonies (Fig. S1, electronic supplementary material),  
164 which supports the reliability of FAOSTAT colony number data as a proxy for honeybee  
165 abundance.

166 For all years, countries and plant species combined, the logarithm of the ratio between  
167 proportions of wild bees and honeybees at flowers [ $\text{logit}(p_{wb})$ ] encompassed the whole  
168 range of possible values, and there was extensive overlap between cultivated and wild-



growing plants (Fig. 3). Wild bees tended to be proportionally more abundant in flowers of wild-growing plants, with mean  $\text{logit}(p_{wb})$  differing significantly between cultivated and wild-growing plants (Chi-squared = 18.96,  $P = 0.000013$ , Kruskal-Wallis rank sum test). For all the data combined (“naïve” least-squares regression fitted to the data; Fig. 4A), there existed a statistically significant, negative relationship between  $\text{logit}(p_{wb})$  and year of study ( $r_s = -0.139$ ,  $N = 336$ ,  $P = 0.011$ , Spearman rank correlation), thus suggesting a declining temporal trend in the importance of wild bees at flowers relative to honeybees over the period considered (Fig. 4A). The reality of this trend was corroborated and strengthened after accounting statistically for correlations underlying the data and unbalanced distribution across plant types, countries, plant families and plant species.

Results of the linear mixed model testing for the effect of year of study on  $\text{logit}(p_{wb})$  are summarized in Table 1. After statistically accounting for plant type (wild-growing vs. cultivated), country, plant family and plant species, there was a highly significant negative effect of study year on  $\text{logit}(p_{wb})$ . The effect was similar for wild-growing and cultivated species, as denoted by the statistical nonsignificance of the year x plant type interaction. After statistically accounting for the rest of effects in the model, the effect of plant type on  $\text{logit}(p_{wb})$  was only marginally significant (Table 1). Mean predicted marginal effects of year on  $\text{logit}(p_{wb})$ , computed separately for wild-growing and cultivated plants, illustrate a linear decline in  $\text{logit}(p_{wb})$  over the study period (Fig. 4B). In 1963, the data-predicted proportion of wild bees at flowers roughly quadruplicated that of honeybees, while the proportions of both groups had become roughly similar in 2017. This long-term replacement of wild bees by honeybees at flowers occurred at similar rates in wild and cultivated plants, as shown by the parallel predicted marginal effects (Fig. 4B).

## Discussion

Previous studies that have examined long-term trends in honeybee colony numbers from a

194 wide geographical perspective have shown that (1) there is not any hint of honeybees  
 195 declining at a planetary scale, but instead considerable evidence that the total number of  
 196 colonies is increasing globally and in almost every continent; (2) well-documented  
 197 instances of honeybee decline are few and fairly restricted geographically, being mostly  
 198 circumscribed to parts of Europe and North America; and (3) in the thoroughly-  
 199 investigated European continent, honeybee declines have occurred in mid-latitude and  
 200 northern countries, while stability or increases predominate in the south (Aizen and Harder  
 201 2009a, Potts et al. 2010, vanEngelsdorp and Meixner 2010, Moritz and Erler 2016). As an  
 202 example, Fig. 5 depicts the inverse trajectories of honeybee colony density over the last  
 203 half century in Germany and Spain, two representative examples for mid-western Europe  
 204 and the Mediterranean Basin, respectively (see also vanEngelsdorp and Meixnar: Fig. 2).  
 205 The analyses presented in this study show that honeybee colonies have increased  
 206 exponentially over the last 50 years in the Mediterranean Basin, comprising areas of  
 207 southern Europe, the Middle East and Northern Africa. The latter two regions are  
 208 prominent examples of ecologically understudied areas (Martin et al. 2012) and, as far as I  
 209 know, have been never considered in quantitative analyses of bee population trends. The  
 210 empirical evidence available, therefore, supports the view that, to the extent that  
 211 extrapolations on “pollinator decline” or “pollination crisis” were at some time inspired by  
 212 honeybee declines (see, e.g., Ghazoul 2005, Potts et al. 2010, Ollerton 2017, for reviews),  
 213 such generalizations provide prime examples of distorted ecological knowledge arising  
 214 from geographically biased data (Ghazoul 2005, Martin et al. 2012, Archer et al. 2014,  
 215 Culumber et al. 2019).

216 Correlative and experimental evidence alike has recently shown that, at local or  
 217 regional scales, honeybees can have strong negative impacts on wild bee populations in  
 218 both natural and anthropogenic scenarios (Shavit et al. 2009, Lindström et al. 2016, Torné-

219 Noguera et al. 2016, Magrach et al. 2017, Ropars et al. 2019, Valido et al. 2019), and that  
 220 the absence of honeybees in well-preserved natural areas is associated with increasing  
 221 wild bee populations (Herrera 2019). Much of the direct or circumstantial evidence on the  
 222 harmful effects of honeybees on wild bees originated in the Mediterranean Basin, which  
 223 motivated the hypothesis formulated in this paper of a possible replacement of wild bees  
 224 by honeybees in the Mediterranean running parallel to the increasing abundance of  
 225 honeybees. This hypothesis has been tested using literature data from highly  
 226 heterogeneous sources, and originally collected using an enormous variety of field  
 227 procedures. The data were also imbalanced with regard to observation year, country of  
 228 origin or plant species identity, all of which combined to produce a “messy” dataset.  
 229 Despite these limitations, the data have verified the prediction of a gradual long-term  
 230 replacement of wild bees by honeybees in flowers of the Mediterranean Basin. This  
 231 conclusion persisted regardless of whether the hypothesis was tested “naïvely” (i.e.,  
 232 simple correlation on all data pooled) or by fitting a linear mixed model where major  
 233 sources of data “messiness” were appropriately handled by treating them as random  
 234 effects. Estimated marginal effects predicted from the mixed model revealed that, on  
 235 average, the proportion of wild bees at Mediterranean flowers roughly quadruplicated that  
 236 of honeybees at the beginning of the period considered ( $\text{logit}(p_{wb}) \sim 1.5$ ) while fifty years  
 237 later the proportions of both groups had become roughly similar ( $\text{logit}(p_{wb}) \sim 0$ ).

238 On average, model-predicted importance of wild bees relative to honeybees was  
 239 slightly lower in flowers of cultivated plants throughout the period considered, a finding  
 240 that seems logically related to the traditional practice of placing honeybee colonies in the  
 241 vicinity of orchards or cultivated land to ensure crop pollination. More difficult to  
 242 interpret is the close similarity between wild and cultivated plants in average replacement  
 243 rate of wild bees by honeybees in flowers, as denoted by parallel slopes of mean predicted

244 marginal effects of year on  $\text{logit}(p_{wb})$  and the statistical nonsignificance of the year x plant  
 245 type interaction effect. A tentative interpretation of this finding is that the causal  
 246 mechanism behind temporal trends in bee composition at flowers was one and the same  
 247 for cultivated and wild plants, or in other words, that increasing honeybee colony density  
 248 affected in similarly negative ways to wild bees in flowers from anthropogenous and  
 249 natural habitats. Irrespective of the causal mechanism accounting for it, however, parallel  
 250 trends in the decline of wild bees relative to honeybees in wild and cultivated plants  
 251 corroborate in a broader geographical context previous findings at a regional scale  
 252 showing that natural Mediterranean habitats are not exempt from the negative impact of  
 253 increasing honeybee densities in anthropogenous habitats nearby (Magrach et al. 2017).

254 Results of this study are important because the Mediterranean Basin is a world  
 255 biodiversity hotspot for both wild bees and wild bee-pollinated plants (Petanidou and  
 256 Vokou 1993, Dafni and O'Toole 1994, Michener 2000, Petanidou and Lamborn 2005,  
 257 Harrison and Noss 2017). Predicting the global consequences for the Mediterranean flora  
 258 of the proportional decline of wild bees as floral visitors documented in this paper will  
 259 require extensive data, e.g., on the pollinating effectiveness of different groups of bees on  
 260 different plants. Nevertheless, studies conducted so far on the effectiveness of honeybees  
 261 and wild bees as pollinators of cultivated and wild species in the Mediterranean Basin  
 262 have found that wild bees generally are better pollinators than honeybees (Herrera 1987,  
 263 Obeso 1992, Bosch and Blas 1994, Vicens and Bosch 2000, Potts et al. 2001, Monzón et  
 264 al. 2004). If these limited findings are corroborated in the future by more extensive  
 265 investigations, then the gradual replacement of wild bees by honeybees currently  
 266 underway in Mediterranean flowers could translate into impaired fruit and seed production  
 267 and, in the case of pollen-limited wild plants, reduced population recruitment.

268 It does not seem implausible to suggest that, because of its colossal magnitude and

269 spatial extent, the exponential flood of honeybee colonies that is silently taking over the  
 270 Mediterranean Basin can pose serious threats to two hallmarks of the Mediterranean  
 271 biome, namely the extraordinary diversities of wild bees and wild bee-pollinated plants  
 272 (Blondel et al. 2010). The Mediterranean Basin is home to ~3300 wild bee species, or  
 273 about 87% of those occurring in the whole Western Palaearctic region (data taken from  
 274 Discover Life, <https://www.discoverlife.org/>, accessed 1 November 2019; and Kuhlmann  
 275 2019). Large as that percent may seem, it is likely an underestimate given the imperfect  
 276 knowledge of Mediterranean Africa wild bee faunas. From a conservation perspective,  
 277 actions advocated for promoting apiculture or enhancing honeybee populations in  
 278 European regions where the species is actually declining (de la Rúa et al. 2009, Cayuela et  
 279 al. 2011) should not be transferred uncritically to the Mediterranean Basin, as Fig. 5  
 280 should make clear. In the Mediterranean, such actions would be aiming at the wrong  
 281 conservation target and, even worse, could be indirectly threatening the unique regional  
 282 diversity of wild bees, wild bee-pollinated plants and their mutualistic relationships.

## 283 **Acknowledgements**

284 This study was prompted by the troubling discrepancy between allusions to the  
285 honeybees' impending demise so often found in popular media, and my subjective  
286 impression in the field that managed honeybees are quickly displacing wild bees from the  
287 flowers of many species in the Iberian Peninsula. Assistance from the Red de Bibliotecas  
288 y Archivos del CSIC was essential for procuring old publications from rather obscure  
289 sources. I am grateful to Oscar Aguado, Angel Guardiola, Fernando Jubete and Alejandro  
290 Martínez Abraín for stimulating discussion, and Mónica Medrano for suggestions on the  
291 manuscript. The research reported in this paper received no specific grant from any  
292 funding agency.

## 293 **References**

- 294 Aizen, M. A., and L. D. Harder. 2009a. The global stock of domesticated honey bees is  
295 growing slower than agricultural demand for pollination. *Current Biology* 19:915–  
296 918.
- 297 Aizen, M. A., and L. D. Harder. 2009b. Geographic variation in the growth of  
298 domesticated honey-bee stocks. *Communicative & Integrative Biology* 2:464–466.
- 299 Archer, C. R., C. W. W. Pirk, L. G. Carvalheiro, and S. W. Nicolson. 2014. Economic and  
300 ecological implications of geographic bias in pollinator ecology in the light of  
301 pollinator declines. *Oikos* 123:401–407.
- 302 Bates, D., M. Maechler, B. Bolker, and S. Walker. 2015. Fitting linear mixed-effects  
303 models using lme4. *Journal of Statistical Software* 67:1–48.
- 304 Blondel, J., J. Aronson, J. Y. Bodiou, and G. Boeuf. 2010. The Mediterranean Region.  
305 Biological diversity in space and time. 2nd edition. Oxford University Press, Oxford,  
306 UK.
- 307 Bolker, B. M. 2015. Linear and generalized linear mixed models. Pages 309–333 in G. A.

- 308 Fox, S. Negrete-Yankelevich, and V. J. Sosa. Ecological statistics: contemporary  
309 theory and application. Oxford University Press, Oxford, UK.
- 310 Bosch, J., and M. Blas. 1994. Foraging behaviour and pollinating efficiency of *Osmia*  
311 *cornuta* and *Apis mellifera* on almond (Hymenoptera, Megachilidae and Apidae).  
312 Applied Entomology and Zoology 29:1–9.
- 313 Breeze, T. D., N. Gallai, L. A. Garibaldi, and X. S. Li. 2016. Economic measures of  
314 pollination services: shortcomings and future directions. Trends in Ecology &  
315 Evolution 31:927–939.
- 316 Cayuela, L., S. Ruiz-Arriaga, and C. P. Ozers. 2011. Honeybees increase fruit set in native  
317 plant species important for wildlife conservation. Environmental Management  
318 48:910–919.
- 319 Culumber, Z. W., J. M. Anaya-Rojas, W. W. Booker, A. F. Hooks, E. C. Lange, B. Pluer,  
320 N. Ramirez-Bullon, and J. Travis. 2019. Widespread biases in ecological and  
321 evolutionary studies. BioScience 69:631–640.
- 322 Dafni, A., and C. O'Toole. 1994. Pollination syndromes in the Mediterranean:  
323 generalizations and peculiarities. Pages 125-135 in M. Arianoutsou and R. H. Groves,  
324 editors. Plant-animal interactions in Mediterranean-type ecosystems. Kluwer  
325 Academic Publishers.
- 326 De la Rúa, P., R. Jaffé, R. Dall'Olio, I. Muñoz, and J. Serrano. 2009. Biodiversity,  
327 conservation and current threats to European honeybees. Apidologie 40:263–284.
- 328 Fox, J., and S. Weisberg. 2011. An R companion to applied regression. Second Edition.  
329 Sage Publishing, Thousand Oaks, California.
- 330 Ghazoul, J. 2005. Buzziness as usual? Questioning the global pollination crisis. Trends in  
331 Ecology & Evolution 20:367–373.
- 332 Goulson, D., and K. R. Sparrow. 2009. Evidence for competition between honeybees and

333       bumblebees; effects on bumblebee worker size. *Journal of Insect Conservation*  
334       13:177–181.

335   Harrison, S., and R. Noss. 2017. Endemism hotspots are linked to stable climatic refugia.  
336       *Annals of Botany* 119:207–214.

337   Herrera, C. M. 1987. Components of pollinator 'quality': comparative analysis of a diverse  
338       insect assemblage. *Oikos* 50:79–90.

339   Herrera, C. M. 2019. Complex long-term dynamics of pollinator abundance in undisturbed  
340       Mediterranean montane habitats over two decades. *Ecological Monographs* 89:  
341       e01338.

342   Hofmann, M. M., A. Fleischmann, and S. S. Renner. 2018. Changes in the bee fauna of a  
343       German botanical garden between 1997 and 2017, attributable to climate warming,  
344       not other parameters. *Oecologia* 187:701–706.

345   Hung, K. L. J., J. M. Kingston, M. Albrecht, D. A. Holway, and J. R. Kohn. 2018. The  
346       worldwide importance of honey bees as pollinators in natural habitats. *Proceedings of*  
347       *the Royal Society B* 285: 20172140.

348   Jamieson, M. A., A. L. Carper, C. J. Wilson, V. L. Scott, and J. Gibbs. 2019. Geographic  
349       biases in bee research limits understanding of species distribution and response to  
350       anthropogenic disturbance. *Frontiers in Ecology and Evolution* 7:194.

351   Kuhlmann, M. 2019. Checklist of the Western Palaearctic Bees (Hymenoptera: Apoidea:  
352       Anthophila). <http://westpalbees.myspecies.info> (accessed 1 November 2019).

353   Lindström, S. A. M., L. Herbertsson, M. Rundlöf, R. Bommarco, and H. G. Smith. 2016.  
354       Experimental evidence that honeybees depress wild insect densities in a flowering  
355       crop. *Proceedings of the Royal Society B* 283: 20161641.

356   Lüdecke, D. 2018. ggeffects: Create tidy data frames of marginal effects for 'ggplot' from  
357       model outputs. R package version 0.3.1, <https://CRAN.R->



358 [project.org/package=ggeffects](https://project.org/package=ggeffects).

359 Magrach, A., J. P. González-Varo, M. Boiffier, M. Vilà, and I. Bartomeus. 2017.

360 Honeybee spillover reshuffles pollinator diets and affects plant reproductive success.

361 Nature Ecology & Evolution 1:1299–1307.

362 Martin, L. J., B. Blossey, and E. Ellis. 2012. Mapping where ecologists work: biases in the

363 global distribution of terrestrial ecological observations. Frontiers in Ecology and the

364 Environment 10:195–201.

365 McLean, R. A., W. L. Sanders, and W. W. Stroup. 1991. A unified approach to mixed

366 linear models. The American Statistician 45:54–64.

367 Michener, C. D. 2000. The bees of the World. John Hopkins, Baltimore, Maryland, USA.

368 Monzón, V. H., J. Bosch, and J. Retana. 2004. Foraging behavior and pollinating

369 effectiveness of *Osmia cornuta* (Hymenoptera: Megachilidae) and *Apis mellifera*

370 (Hymenoptera: Apidae) on “Comice” pear. Apidologie 35:575–585.

371 Moritz, R. F. A., and S. Erler. 2016. Lost colonies found in a data mine: global honey

372 trade but not pests or pesticides as a major cause of regional honeybee colony

373 declines. Agriculture, Ecosystems & Environment 216:44–50.

374 Nicholson, C. C., and P. A. Egan. 2019. Natural hazard threats to pollinators and

375 pollination. Global Change Biology. Doi: 10.1111/gcb.14840

376 Obeso, J. R. 1992. Pollination ecology and seed set in *Asphodelus albus* (Liliaceae) in

377 northern Spain. Flora 187:219–226.

378 Ollerton, J. 2017. Pollinator diversity: distribution, ecological function, and conservation.

379 Annual Review of Ecology, Evolution, and Systematics 48:353–376.

380 Ollerton, J., H. Erenler, M. Edwards, and R. Crockett. 2014. Extinctions of aculeate

381 pollinators in Britain and the role of large-scale agricultural changes. Science

382 346:1360–1362.

383 Petanidou, T., and D. Vokou. 1993. Pollination ecology of Labiatae in a phryganic (East  
384 Mediterranean) ecosystem. *American Journal of Botany* 80:892–899.

385 Petanidou, T., and E. Lamborn. 2005. A land for flowers and bees: studying pollination  
386 ecology in Mediterranean communities. *Plant Biosystems* 139:279–294.

387 Potts, S. G., A. Dafni, and G. Ne'eman. 2001. Pollination of a core flowering shrub species  
388 in Mediterranean phrygana: variation in pollinator diversity, abundance and  
389 effectiveness in response to fire. *Oikos* 92:71–80.

390 Potts, S. G., J. C. Biesmeijer, C. Kremen, P. Neumann, O. Schweiger, and W. E. Kunin.  
391 2010. Global pollinator declines: trends, impacts and drivers. *Trends in Ecology &*  
392 *Evolution* 25:345–353.

393 Potts, S. G., S. P. M. Roberts, R. Dean, G. Marris, M. A. Brown, R. Jones, P. Neumann,  
394 and J. Settele. 2010. Declines of managed honey bees and beekeepers in Europe.  
395 *Journal of Apicultural Research* 49:15–22.

396 R Core team. 2018. R: a language and environment for statistical computing. R  
397 Foundation for Statistical Computing, Vienna, Austria. <https://www.R-project.org/>

398 Rodger, J. G., K. Balkwill, and B. Gemmill. 2004. African pollination studies: where are  
399 the gaps? *International Journal of Tropical Insect Science* 24:5–28.

400 Ropars, L., I. Dajoz, C. Fontaine, A. Muratet, and B. Geslin. 2019. Wild pollinator activity  
401 negatively related to honey bee colony densities in urban context. *PLoS One*  
402 14:e0222316.

403 Schabenberger, O., and F. J. Pierce. 2001. Contemporary statistical models for the plant  
404 and soil sciences. CRC Press, Boca Raton, Florida, USA.

405 Senapathi, D., L. G. Carvalheiro, J. C. Biesmeijer, C. A. Dodson, R. L. Evans, M.  
406 McKerchar, R. D. Morton, E. D. Moss, S. P. M. Roberts, W. E. Kunin, and S. G.  
407 Potts. 2015. The impact of over 80 years of land cover changes on bee and wasp

408 pollinator communities in England. *Proceedings of the Royal Society B*  
409 282:20150294.

410 Shavit, O., A. Dafni, and G. Ne'eman. 2009. Competition between honeybees (*Apis*  
411 *mellifera*) and native solitary bees in the Mediterranean region of Israel—Implications  
412 for conservation. *Israel Journal of Plant Sciences* 57:171–183.

413 Torné-Noguera, A., A. Rodrigo, S. Osorio, and J. Bosch. 2016. Collateral effects of  
414 beekeeping: impacts on pollen-nectar resources and wild bee communities. *Basic and*  
415 *Applied Ecology* 17:199–209.

416 Valido, A., M. C. Rodríguez-Rodríguez, and P. Jordano. 2019. Honeybees disrupt the  
417 structure and functionality of plant-pollinator networks. *Scientific Reports* 9:4711.

418 vanEngelsdorp, D., and M. D. Meixner. 2010. A historical review of managed honey bee  
419 populations in Europe and the United States and the factors that may affect them.  
420 *Journal of Invertebrate Pathology* 103:S80–S95.

421 Vicens, N., and J. Bosch. 2000. Pollinating efficacy of *Osmia cornuta* and *Apis mellifera*  
422 (Hymenoptera: Megachilidae, Apidae) on 'Red Delicious' apple. *Environmental*  
423 *Entomology* 29:235–240.

424 Winfree, R., R. Aguilar, D. P. Vázquez, G. LeBuhn, and M. A. Aizen. 2009. A meta-  
425 analysis of bees' responses to anthropogenic disturbance. *Ecology* 90:2068–2076.

426

427 Table 1. Summary of results of the linear mixed model testing for the significance of  
428 supra-annual variation in  $\text{logit}(p_{wb})$ , the log of the quotient between proportions of  
429 wild bees and honeybees, in flowers of wild-growing and cultivated plants of the  
430 Mediterranean Basin.

|                 | Standardized<br>parameter estimate<br>(standard error) | Chi-<br>squared | <i>P</i> value | Variance<br>(95% confidence<br>interval) |
|-----------------|--------------------------------------------------------|-----------------|----------------|------------------------------------------|
| Fixed effects   |                                                        |                 |                |                                          |
| Year (Y)        | -0.314 (0.137)                                         | 10.94           | 0.00094        |                                          |
| Plant type (PT) | 0.566 (0.306)                                          | 3.45            | 0.063          |                                          |
| Y x PT          | 0.030 (0.184)                                          | 0.027           | 0.87           |                                          |
| Random effects  |                                                        |                 |                |                                          |
| Country         |                                                        |                 |                | 0.357 (0.040-1.254)                      |
| Plant family    |                                                        |                 |                | 0.389 (0.091-0.983)                      |
| Plant species   |                                                        |                 |                | 1.399 (0.896-1.997)                      |

431

432

## Legends to figures

Fig. 1. Distribution among 13 circum-Mediterranean countries of the  $N = 336$  published estimates of wild bee and honeybee abundance in flowers of cultivated and wild-growing plants for the period 1963-2017 considered in this study (Table S1, electronic supplementary material).

Fig. 2. Variation over 1963-2017 in density of honeybee colonies in the 13 circum-Mediterranean countries considered in this study (gray lines), and overall relationship for the Mediterranean Basin as a whole (blue line; estimated from parameters obtained by fitting a linear mixed model to the data with country as a random effect). Note the logarithmic scale on vertical axis.

Fig. 3. Frequency distribution of  $\text{logit}(p_{wb})$ , the logarithm of the ratio between proportions of wild bees and honeybees at flowers, in the  $N = 336$  unique combinations of plant species x sampling year x sampling location considered in this study. Bars to the left and right of the vertical dashed line [ $\text{logit}(p_{wb}) = 0$ ] correspond to situations of numerical dominance at flowers of honeybees and wild bees, respectively.

Fig. 4. A. Relationship between  $\text{logit}(p_{wb})$ , the logarithm of the ratio between proportions of wild bees and honeybees at flowers, and year of study. Each dot corresponds to a unique combinations of plant species x sampling year x sampling location ( $N = 336$ ). The black line is the “naïve” least-squares regression fitted to the data, all countries, plant species and plant types (cultivated and wild-growing) combined. B. Mean marginal effects of year on  $\text{logit}(p_{wb})$  for cultivated and wild-growing plants, as predicted from the linear mixed model with country, plant family, and plant species as random effects (Table 1).

Fig. 5. Variation over 1963-2017 in density of honeybee colonies in Germany and Spain (gray lines), based on FAOSTAT data (see text). These two countries were

458 chosen as representatives, respectively, of thoroughly-studied, mid-western, temperate-  
459 climate Europe, and insufficiently-studied, southern, Mediterranean-climate Europe.  
460 The blue line depict least-squares fitted linear regressions.  
461

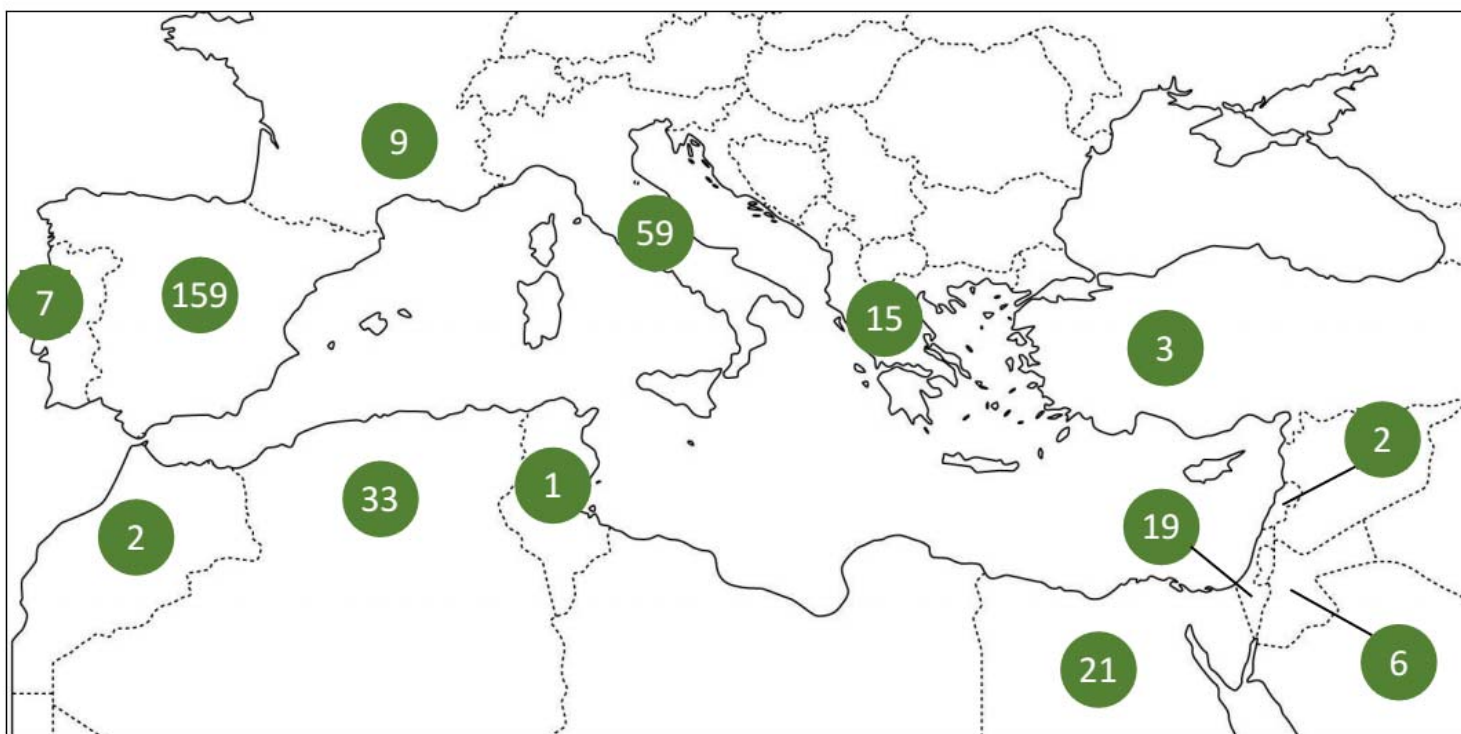**Fig. 1**

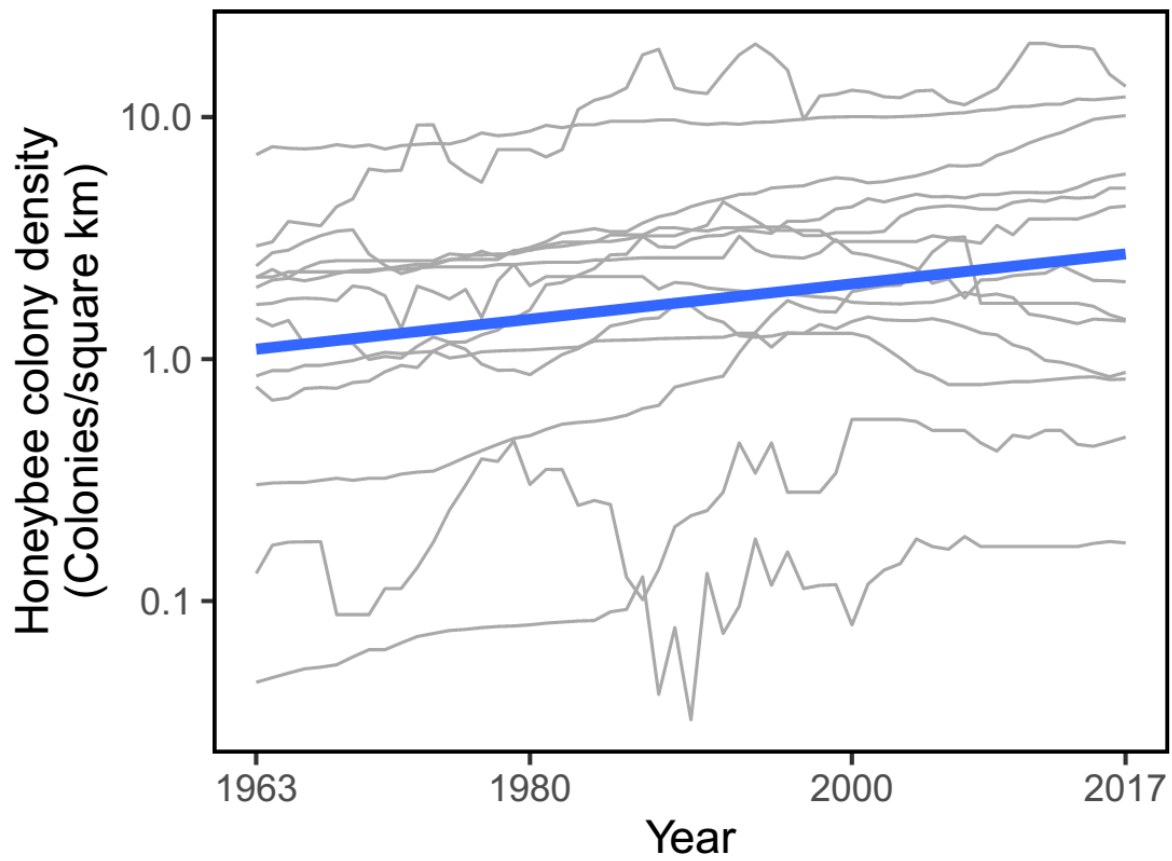

**Fig. 2**



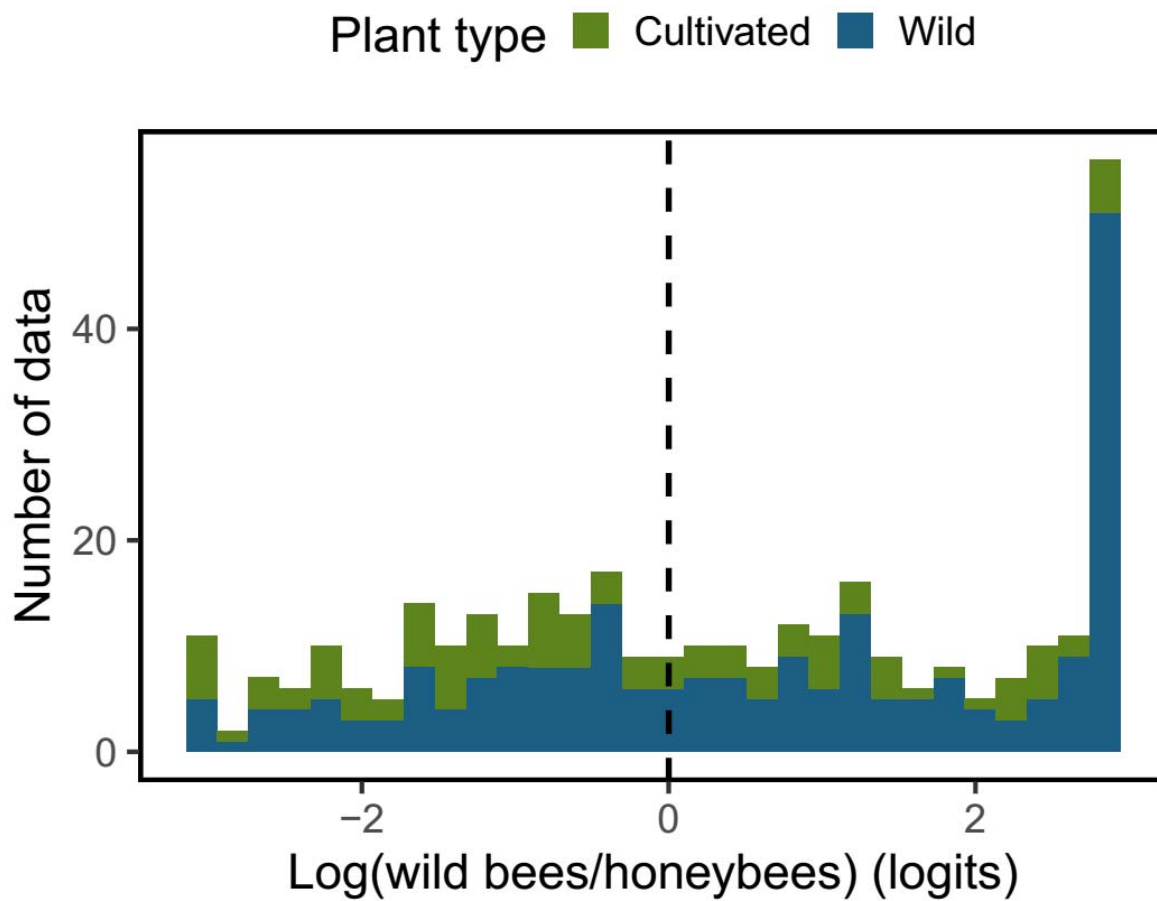

**Fig. 3**

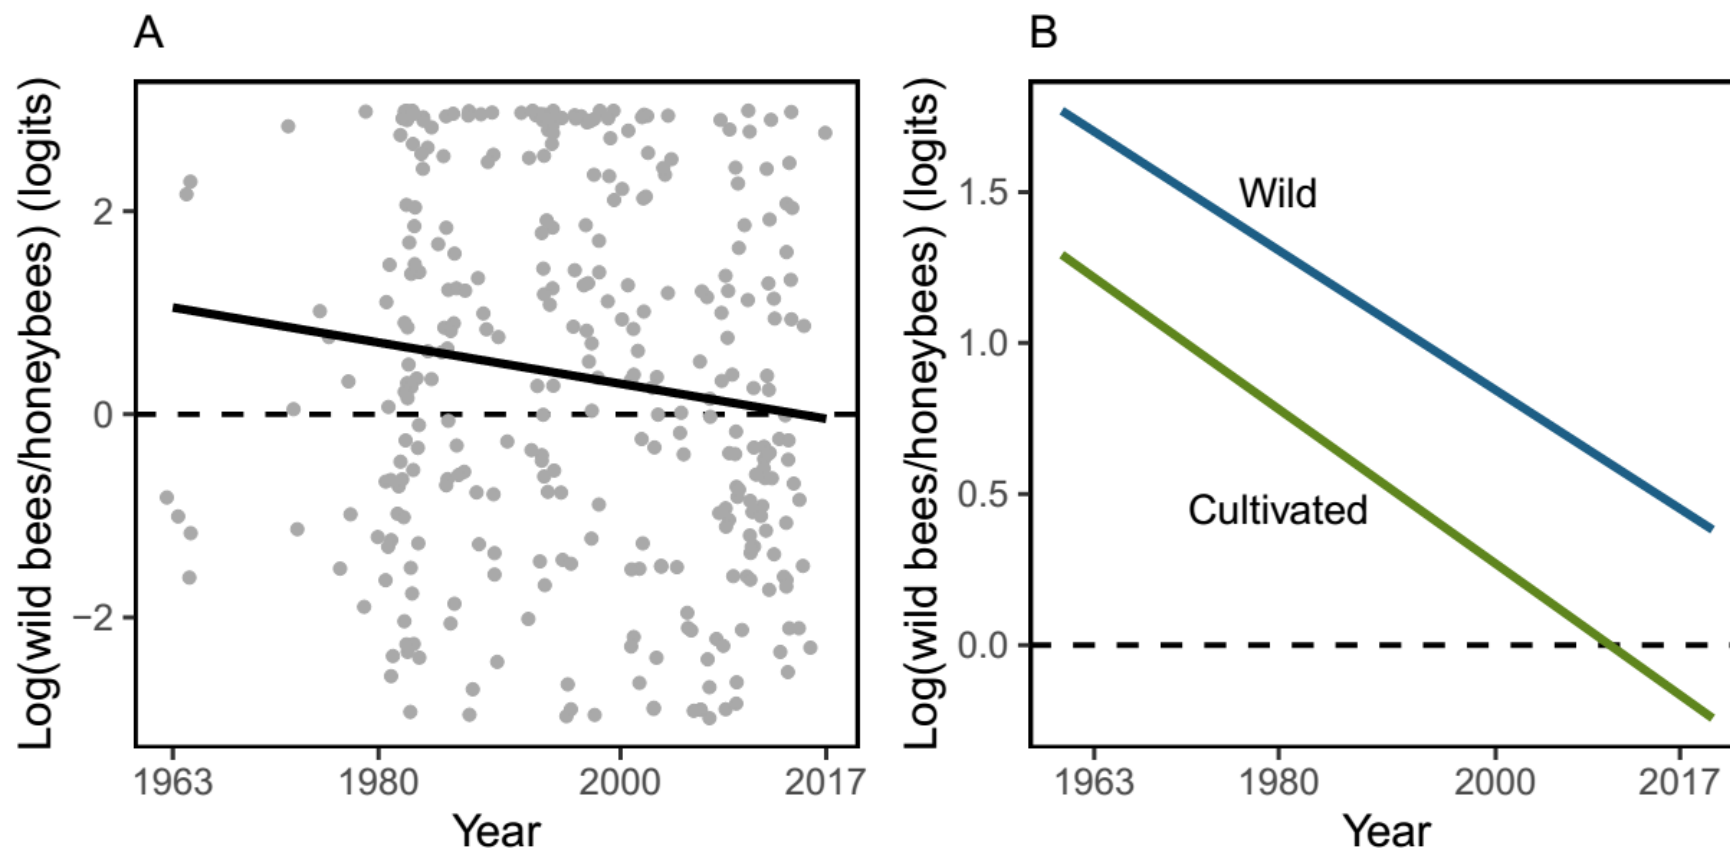**Fig. 4**

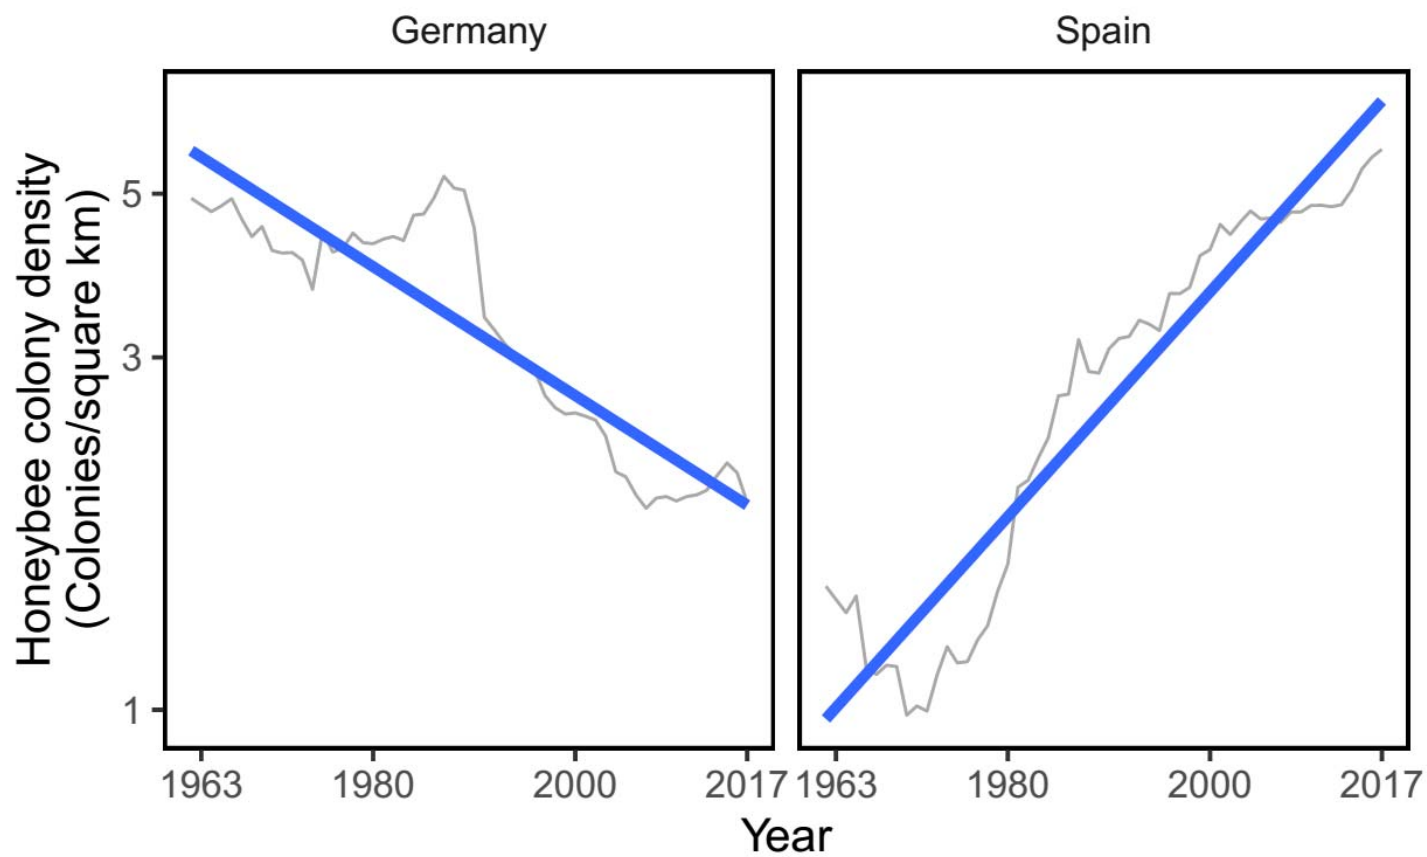**Fig. 5**
